# Supplementary material for: 1.5T MR-Guided Daily-Adaptive SBRT for Prostate Cancer: Preliminary Report of Toxicity and Quality of Life of the First 100 Patients
Source: MDPI journal article supplement (doi:10.3390/jpm12121982), 2022-11-30
Supplement: s1 [file s1]

Table S1 – EORTC-QLQ-C30

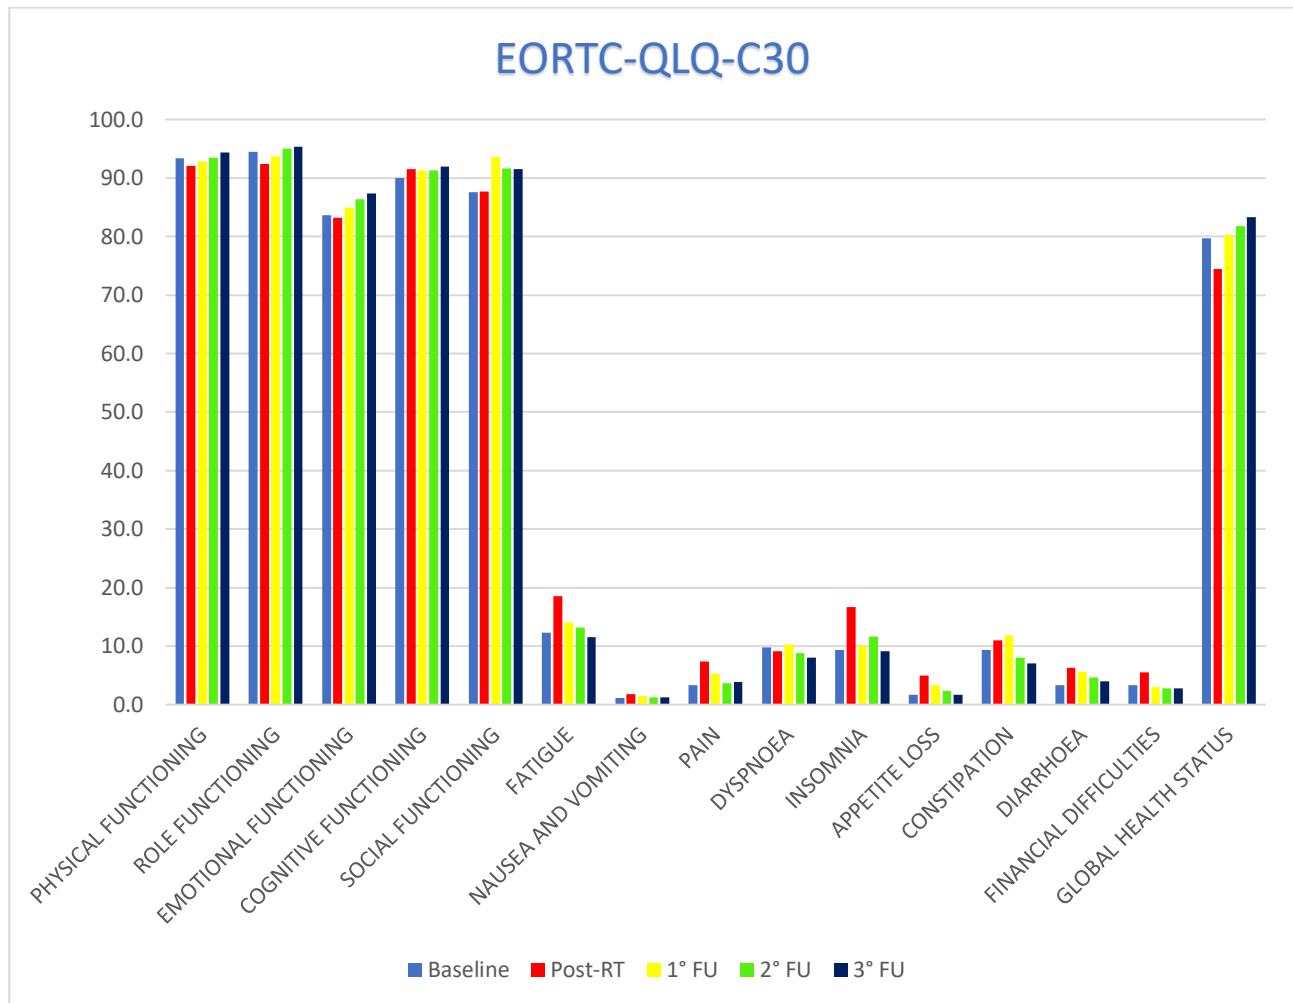

| EORTC-QLQ-C30                                                                                                                                                   | Mean (%) ± SD                                                                | p value (vs Baseline)                                |
|-----------------------------------------------------------------------------------------------------------------------------------------------------------------|------------------------------------------------------------------------------|------------------------------------------------------|
| <b>PHYSICAL FUNCTIONING</b> <ul style="list-style-type: none"> <li>- BASELINE</li> <li>- POST-RT</li> <li>- 1° FU</li> <li>- 2° FU</li> <li>- 3° FU</li> </ul>  | 93.3 ± 12.99<br>92.1 ± 13.59<br>92.9 ± 12.75<br>93.4 ± 12.06<br>94.3 ± 11.22 | -<br><b>0.014</b><br>0.675<br>0.810<br>0.220         |
| <b>ROLE FUNCTIONING</b> <ul style="list-style-type: none"> <li>- BASELINE</li> <li>- POST-RT</li> <li>- 1° FU</li> <li>- 2° FU</li> <li>- 3° FU</li> </ul>      | 94.4 ± 14.70<br>92.4 ± 16.71<br>93.8 ± 13.93<br>95.0 ± 12.06<br>95.3 ± 12.33 | -<br><b>0.033</b><br><b>0.033</b><br>0.340<br>0.054  |
| <b>EMOTIONAL FUNCTIONING</b> <ul style="list-style-type: none"> <li>- BASELINE</li> <li>- POST-RT</li> <li>- 1° FU</li> <li>- 2° FU</li> <li>- 3° FU</li> </ul> | 83.6 ± 18.33<br>83.2 ± 18.76<br>85.0 ± 18.54<br>86.3 ± 18.29<br>87.3 ± 18.25 | -<br>0.617<br>0.142<br><b>0.010</b><br><b>0.0002</b> |

|                              |              |        |
|------------------------------|--------------|--------|
| <b>COGNITIVE FUNCTIONING</b> |              |        |
| - BASELINE                   | 90.0 ± 14.98 | -      |
| - POST-RT                    | 91.5 ± 13.29 | 0.197  |
| - 1° FU                      | 91.3 ± 14.11 | 0.230  |
| - 2° FU                      | 86.3 ± 18.29 | 0.342  |
| - 3° FU                      | 92.0 ± 12.86 | 0.107  |
| <b>SOCIAL FUNCTIONING</b>    |              |        |
| - BASELINE                   | 86.7 ± 25.18 | -      |
| - POST-RT                    | 87.7 ± 23.53 | 0.889  |
| - 1° FU                      | 93.6 ± 13.9  | 0.714  |
| - 2° FU                      | 91.7 ± 20.31 | 0.016  |
| - 3° FU                      | 91.5 ± 20.99 | 0.016  |
| <b>FATIGUE</b>               |              |        |
| - BASELINE                   | 12.3 ± 17.83 | -      |
| - POST-RT                    | 18.5 ± 22.28 | 0.0012 |
| - 1° FU                      | 14.0 ± 20.26 | 0.226  |
| - 2° FU                      | 13.2 ± 20.79 | 0.810  |
| - 3° FU                      | 11.5 ± 18.69 | 0.401  |
| <b>NAUSEA AND VOMITING</b>   |              |        |
| - BASELINE                   | 1.10 ± 5.47  | -      |
| - POST-RT                    | 1.80 ± 5.76  | 0.226  |
| - 1° FU                      | 1.40 ± 6.35  | 0.417  |
| - 2° FU                      | 1.30 ± 6.16  | 0.658  |
| - 3° FU                      | 1.30 ± 6.16  | 0.658  |
| <b>PAIN</b>                  |              |        |
| - BASELINE                   | 3.30 ± 13.81 | -      |
| - POST-RT                    | 7.3 ± 14.85  | 0.009  |
| - 1° FU                      | 5.3 ± 12.73  | 0.033  |
| - 2° FU                      | 3.7 ± 11.98  | 0.565  |
| - 3° FU                      | 3.8 ± 14.18  | 0.320  |
| <b>DYSPNOEA</b>              |              |        |
| - BASELINE                   | 9.8 ± 20.52  | -      |
| - POST-RT                    | 9.2 ± 20.01  | 0.638  |
| - 1° FU                      | 10.3 ± 21.16 | 0.674  |
| - 2° FU                      | 8.8 ± 19.60  | 0.320  |
| - 3° FU                      | 8.0 ± 18.27  | 0.320  |
| <b>INSOMNIA</b>              |              |        |
| - BASELINE                   | 9.3 ± 19.58  | -      |
| - POST-RT                    | 16.7 ± 24.39 | 0.0008 |
| - 1° FU                      | 10.2 ± 19.23 | 0.529  |
| - 2° FU                      | 11.6 ± 20.71 | 0.158  |
| - 3° FU                      | 9.1 ± 18.39  | 0.842  |
| <b>APPETITE LOSS</b>         |              |        |
| - BASELINE                   | 1.7 ± 7.29   | -      |
| - POST-RT                    | 5.0 ± 13.71  | 0.005  |
| - 1° FU                      | 3.3 ± 11.11  | 0.025  |
| - 2° FU                      | 2.3 ± 8.54   | 0.158  |
| - 3° FU                      | 1.7 ± 7.29   | 1      |
| <b>CONSTIPATION</b>          |              |        |
| - BASELINE                   | 9.3 ± 21.75  | -      |
| - POST-RT                    | 11.0 ± 19.56 | 0.447  |
| - 1° FU                      | 11.8 ± 37.67 | 0.509  |
| - 2° FU                      | 8.0 ± 20.17  | 0.249  |
| - 3° FU                      | 7.0 ± 18.53  | 0.188  |
| <b>DIARRHOEA</b>             |              |        |
| - BASELINE                   | 3.3 ± 10.04  | -      |
| - POST-RT                    | 6.3 ± 14.75  | 0.064  |

|                               |              |         |
|-------------------------------|--------------|---------|
| - 1° FU                       | 5.7 ± 13.23  | 0.197   |
| - 2° FU                       | 4.7 ± 12.55  | 0.348   |
| - 3° FU                       | 4.0 ± 14.43  | 0.671   |
| <b>FINANCIAL DIFFICULTIES</b> |              |         |
| - BASELINE                    | 3.3 ± 12.97  | -       |
| - POST-RT                     | 5.5 ± 16.25  | 0.042   |
| - 1° FU                       | 3.0 ± 10.69  | 0.657   |
| - 2° FU                       | 2.8 ± 9.78   | 0.469   |
| - 3° FU                       | 2.8 ± 9.78   | 0.469   |
| <b>GLOBAL HEALTH STATUS</b>   |              |         |
| - BASELINE                    | 79.7 ± 17.25 | -       |
| - POST-RT                     | 74.4 ± 18.79 | 0.00008 |
| - 1° FU                       | 80.3 ± 17.21 | 0.631   |
| - 2° FU                       | 81.8 ± 16.19 | 0.072   |
| - 3° FU                       | 83.3 ± 16.31 | 0.001   |

Table S2 – ICIQ-SF scores

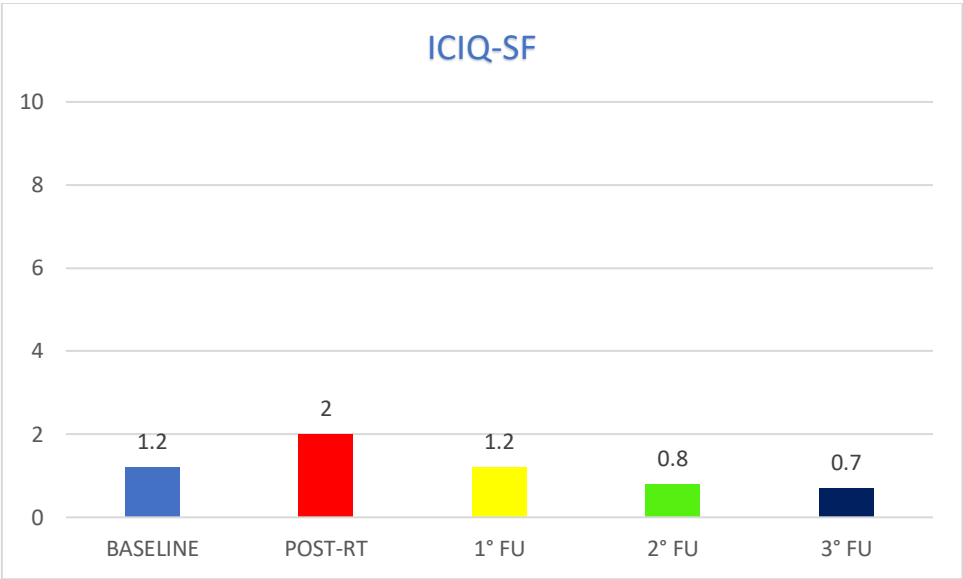

| ICIQ-SF |          | Mean ± SD | p value (vs Baseline) |
|---------|----------|-----------|-----------------------|
| -       | BASELINE | 1.2 ± 2.8 | -                     |
| -       | POST-RT  | 2.0 ± 3.4 | 0.0008                |
| -       | 1° FU    | 1.2 ± 2.6 | 0.66                  |
| -       | 2° FU    | 0.8 ± 2.3 | 0.72                  |
| -       | 3° FU    | 0.7 ± 2.1 | 0.36                  |
| -       |          |           |                       |

Table S3 – IIEF-5 scores

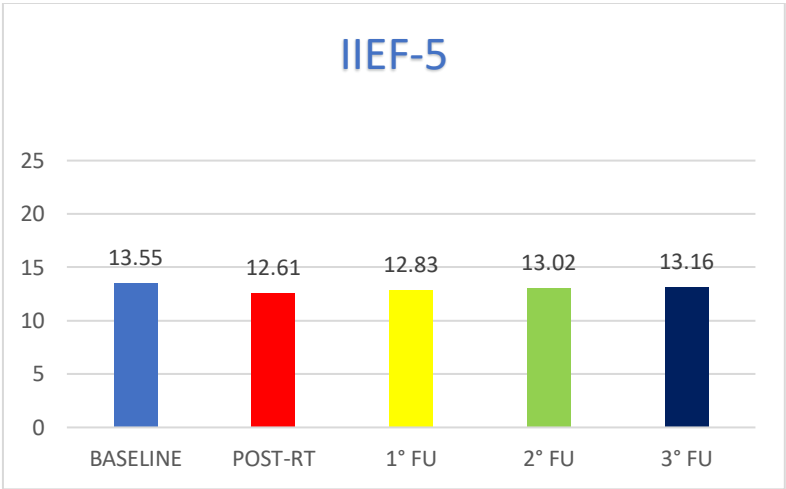

| IIEF-5 |          | Mean ± SD    | p value (vs Baseline) |
|--------|----------|--------------|-----------------------|
| -      | BASELINE | 13.55 ± 9.24 | -                     |
| -      | POST-RT  | 12.61 ± 9.28 | 0.0001                |
| -      | 1° FU    | 12.83 ± 9.14 | 0.075                 |
| -      | 2° FU    | 12.92 ± 9.25 | 0.477                 |
| -      | 3° FU    | 13.02 ± 9.31 | 0.682                 |

Table S4 – EORTC-QLQ-PR25 scores

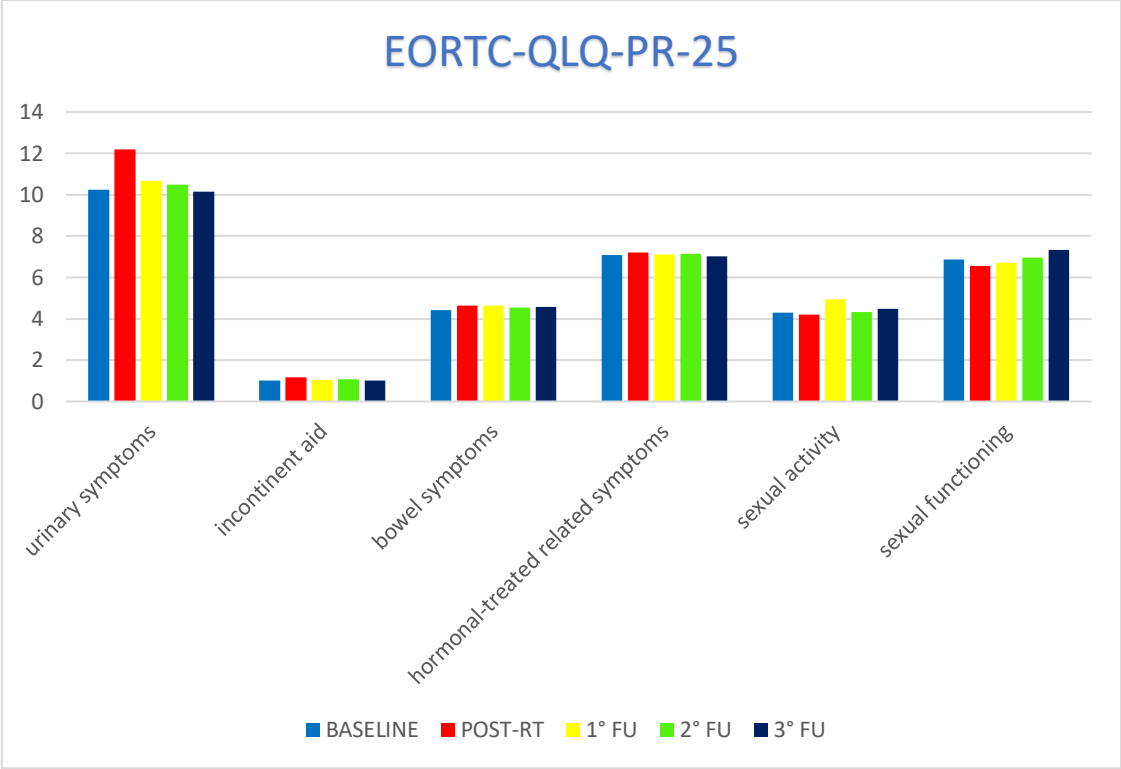

| EORTC-QLQ-PR-25                                                                                                                                      | Mean ± SD                                                                                                                                        | p value (vs Baseline)                                                                                     |
|------------------------------------------------------------------------------------------------------------------------------------------------------|--------------------------------------------------------------------------------------------------------------------------------------------------|-----------------------------------------------------------------------------------------------------------|
| <b>URINARY SYMPTOMS</b> <ul style="list-style-type: none"><li>- BASELINE</li><li>- POST-RT</li><li>- 1° FU</li><li>- 2° FU</li><li>- 3° FU</li></ul> | <ul style="list-style-type: none"><li>10.23 ± 2.24</li><li>12.19 ± 3.52</li><li>10.66 ± 2.31</li><li>10.48 ± 2.84</li><li>10.16 ± 2.36</li></ul> | <ul style="list-style-type: none"><li>-</li><li>0.0001</li><li>0.0067</li><li>0.46</li><li>0.38</li></ul> |
| <b>INCONTINENT AID</b> <ul style="list-style-type: none"><li>- BASELINE</li><li>- POST-RT</li><li>- 1° FU</li><li>- 2° FU</li><li>- 3° FU</li></ul>  | <ul style="list-style-type: none"><li>1.02 ± 0.14</li><li>1.16 ± 0.60</li><li>1.03 ± 0.17</li><li>1.07 ± 0.36</li><li>1.02 ± 0.14</li></ul>      | <ul style="list-style-type: none"><li>-</li><li>0.013</li><li>0.32</li><li>0.32</li><li>1</li></ul>       |
| <b>BOWEL SYMPTOMS</b> <ul style="list-style-type: none"><li>- BASELINE</li><li>- POST-RT</li><li>- 1° FU</li><li>- 2° FU</li><li>- 3° FU</li></ul>   | <ul style="list-style-type: none"><li>4.42 ± 0.74</li><li>4.63 ± 0.87</li><li>4.63 ± 6.16</li><li>4.53 ± 1.03</li><li>4.56 ± 0.96</li></ul>      | <ul style="list-style-type: none"><li>-</li><li>0.007</li><li>0.03</li><li>0.19</li><li>0.06</li></ul>    |
| <b>HORMONAL-TREATED RELATED SYMPTOMS</b> <ul style="list-style-type: none"><li>- BASELINE</li><li>- POST-RT</li></ul>                                | <ul style="list-style-type: none"><li>7.09 ± 1.31</li><li>7.19 ± 1.53</li></ul>                                                                  | <ul style="list-style-type: none"><li>-</li><li>0.46</li></ul>                                            |

|                           |             |      |
|---------------------------|-------------|------|
| - 1° FU                   | 7.12 ± 1.53 | 0.82 |
| - 2° FU                   | 7.13 ± 1.50 | 0.77 |
| - 3° FU                   | 7.01 ± 1.23 | 0.44 |
| <b>SEXUAL ACTIVITY</b>    |             |      |
| - BASELINE                | 4.3 ± 1.62  | -    |
| - POST-RT                 | 4.2 ± 1.50  | 0.32 |
| - 1° FU                   | 4.93 ± 6.16 | 0.30 |
| - 2° FU                   | 4.34 ± 1.60 | 0.72 |
| - 3° FU                   | 4.48 ± 1.59 | 0.16 |
| <b>SEXUAL FUNCTIONING</b> |             |      |
| - BASELINE                | 6.85 ± 2.65 | -    |
| - POST-RT                 | 6.54 ± 2.63 | 0.16 |
| - 1° FU                   | 6.71 ± 2.61 | 0.49 |
| - 2° FU                   | 6.97 ± 2.81 | 0.62 |
| - 3° FU                   | 7.33 ± 3.13 | 0.31 |

Table S5 – EPIC-26 scores

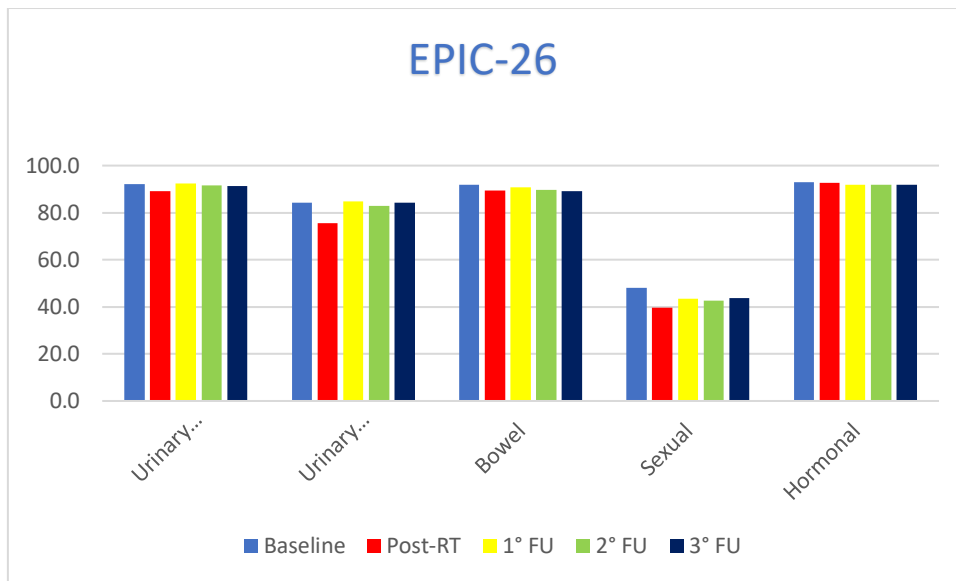

| EPIC-26                                                                                                                                                                  | Mean ± SD                                                               | p value (vs Baseline)                                              |
|--------------------------------------------------------------------------------------------------------------------------------------------------------------------------|-------------------------------------------------------------------------|--------------------------------------------------------------------|
| <b>URINARY INCONTINENCE</b> <ul style="list-style-type: none"> <li>- BASELINE</li> <li>- POST-RT</li> <li>- 1° FU</li> <li>- 2° FU</li> <li>- 3° FU</li> </ul>           | 92.1 ± 13.2<br>89.0 ± 16.1<br>92.3 ± 12.6<br>91.5 ± 13.8<br>91.4 ± 14.1 | -<br><b>0.011</b><br>0.646<br>0.826<br>0.689                       |
| <b>URINARY IRRITATIVE/OBSTRUCTIVE</b> <ul style="list-style-type: none"> <li>- BASELINE</li> <li>- POST-RT</li> <li>- 1° FU</li> <li>- 2° FU</li> <li>- 3° FU</li> </ul> | 84.1 ± 17.2<br>75.6 ± 21.2<br>84.8 ± 14.1<br>82.9 ± 18.1<br>84.2 ± 15.4 | -<br><b>0.0002</b><br>0.881<br>0.424<br>0.984                      |
| <b>BOWEL</b> <ul style="list-style-type: none"> <li>- BASELINE</li> <li>- POST-RT</li> <li>- 1° FU</li> <li>- 2° FU</li> <li>- 3° FU</li> </ul>                          | 91.9 ± 15.8<br>89.3 ± 17.3<br>90.8 ± 14.9<br>89.8 ± 17.0<br>89.0 ± 18.6 | -<br>0.089<br>0.222<br>0.134<br>0.054                              |
| <b>SEXUAL</b> <ul style="list-style-type: none"> <li>- BASELINE</li> <li>- POST-RT</li> <li>- 1° FU</li> <li>- 2° FU</li> <li>- 3° FU</li> </ul>                         | 48.1 ± 29.9<br>39.6 ± 28.4<br>43.4 ± 29.8<br>42.7 ± 29.4<br>43.7 ± 28.9 | -<br><b>0.0001</b><br><b>0.0003</b><br><b>0.005</b><br><b>0.02</b> |
| <b>HORMONAL</b> <ul style="list-style-type: none"> <li>- BASELINE</li> <li>- POST-RT</li> <li>- 1° FU</li> <li>- 2° FU</li> <li>- 3° FU</li> </ul>                       | 93.0 ± 10.9<br>92.6 ± 11.7<br>91.9 ± 10.8<br>91.9 ± 10.6<br>91.8 ± 10.3 | -<br>0.779<br>0.150<br>0.226<br>0.164                              |



Table S6 – IPSS scores

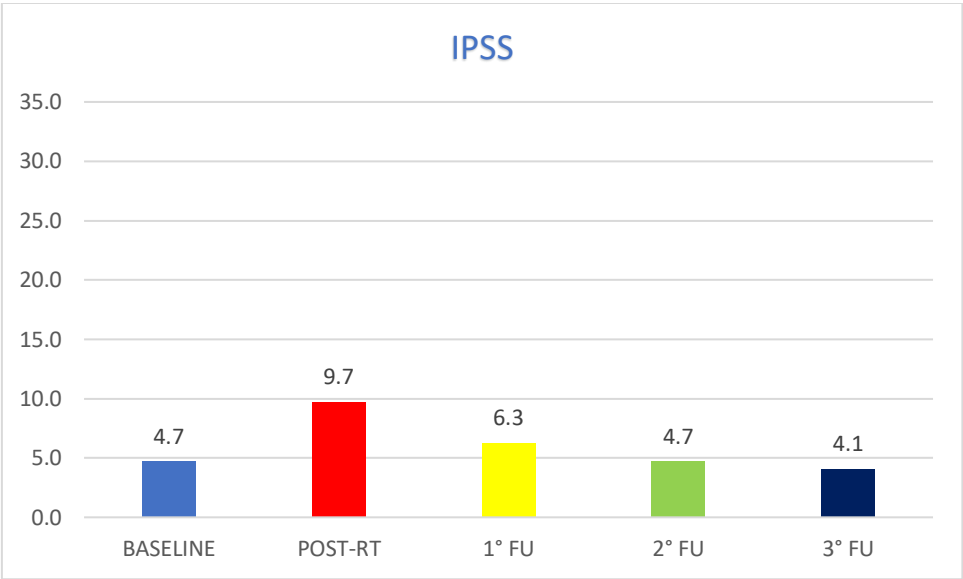

| IPSS       | Mean ± SD | p value (vs Baseline) |
|------------|-----------|-----------------------|
| - BASELINE | 4.7 ± 3.2 | -                     |
| - POST-RT  | 9.7 ± 6.7 | 0.0001                |
| - 1° FU    | 6.3 ± 4.6 | 0.0001                |
| - 2° FU    | 4.7 ± 3.3 | 0.810                 |
| - 3° FU    | 4.7 ± 3.0 | 0.818                 |
